# Supplementary material for: Toxic Effects of Bisphenol A, Propyl Paraben, and Triclosan on Caenorhabditis elegans
Source: MDPI journal article supplement (doi:10.3390/ijerph15040684), 2018-04-05
Supplement: s1 [file s1]

# Supplementary Material

**Table S1.** LC50 values and confidence limits for tested compounds after 24 h exposure.

| Compound   | 24 h-LC50 ( $\mu$ M) | Lower limit ( $\mu$ M) | Upper limit ( $\mu$ M) |
|------------|----------------------|------------------------|------------------------|
| <b>BPA</b> | 113.5                | 25.3                   | 508.9                  |
| <b>PPB</b> | 261.7                | 42.0                   | 1631.1                 |
| <b>TCS</b> | 43.2                 | 8.6                    | 217.1                  |

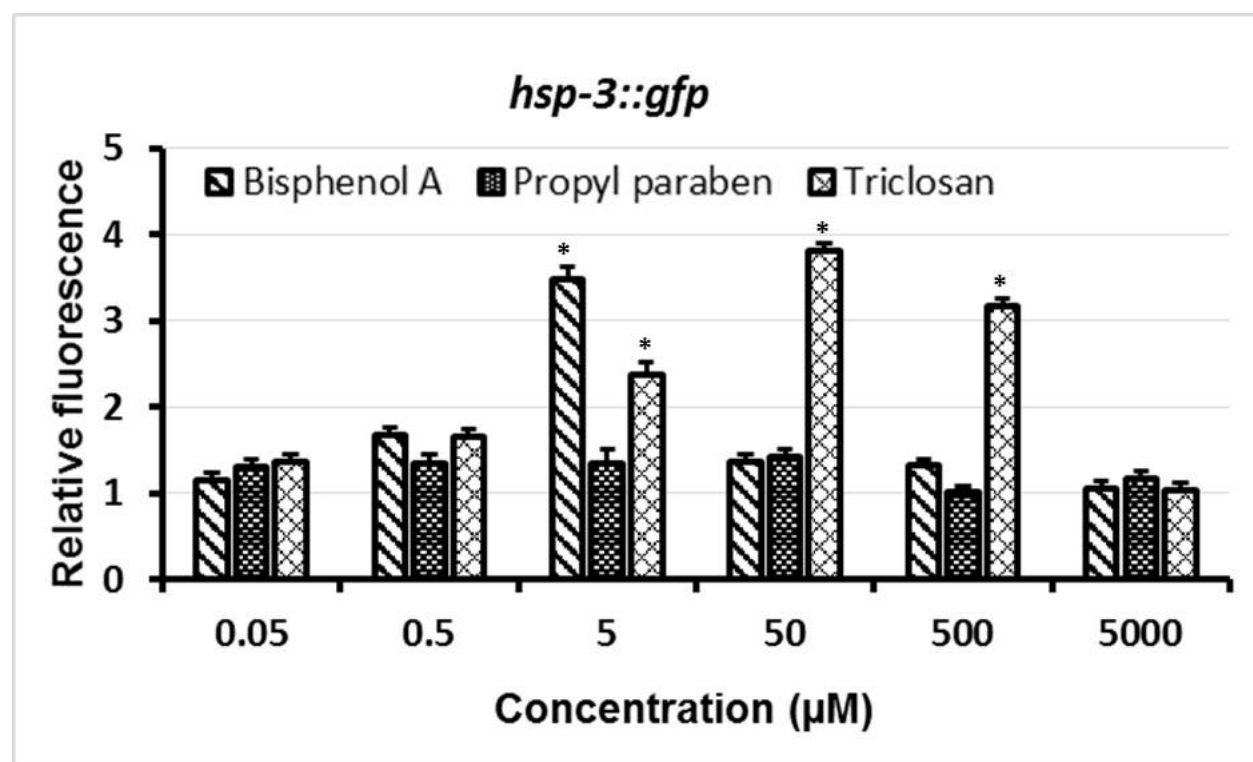

Figure S1. Effects of BPA, PPB and TCS on *hsp-3* gene expression measured as GFP fluorescence. \*-Significant difference with control ( $p < 0.05$ ).

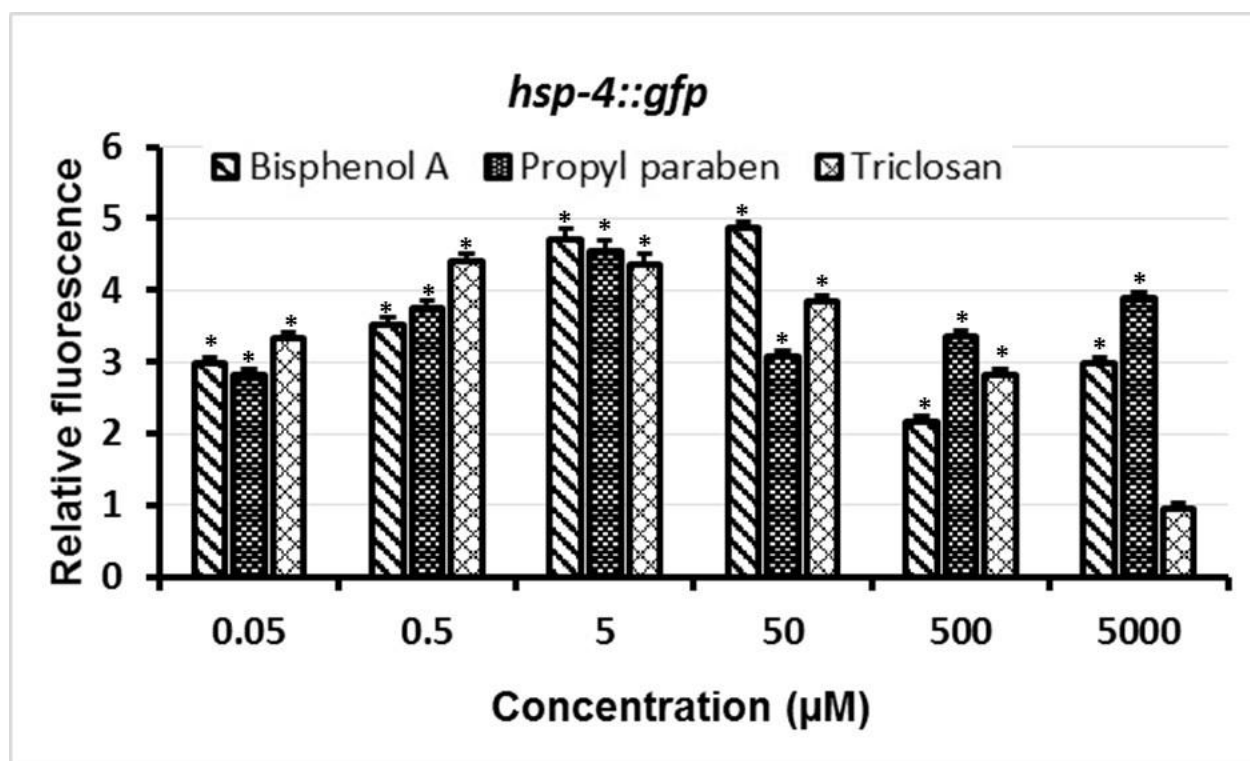

Figure S2. Effects of BPA, PPB and TCS on *hsp-4* gene expression measured as GFP fluorescence.

\*. Significant difference with control ( $p < 0.05$ ).

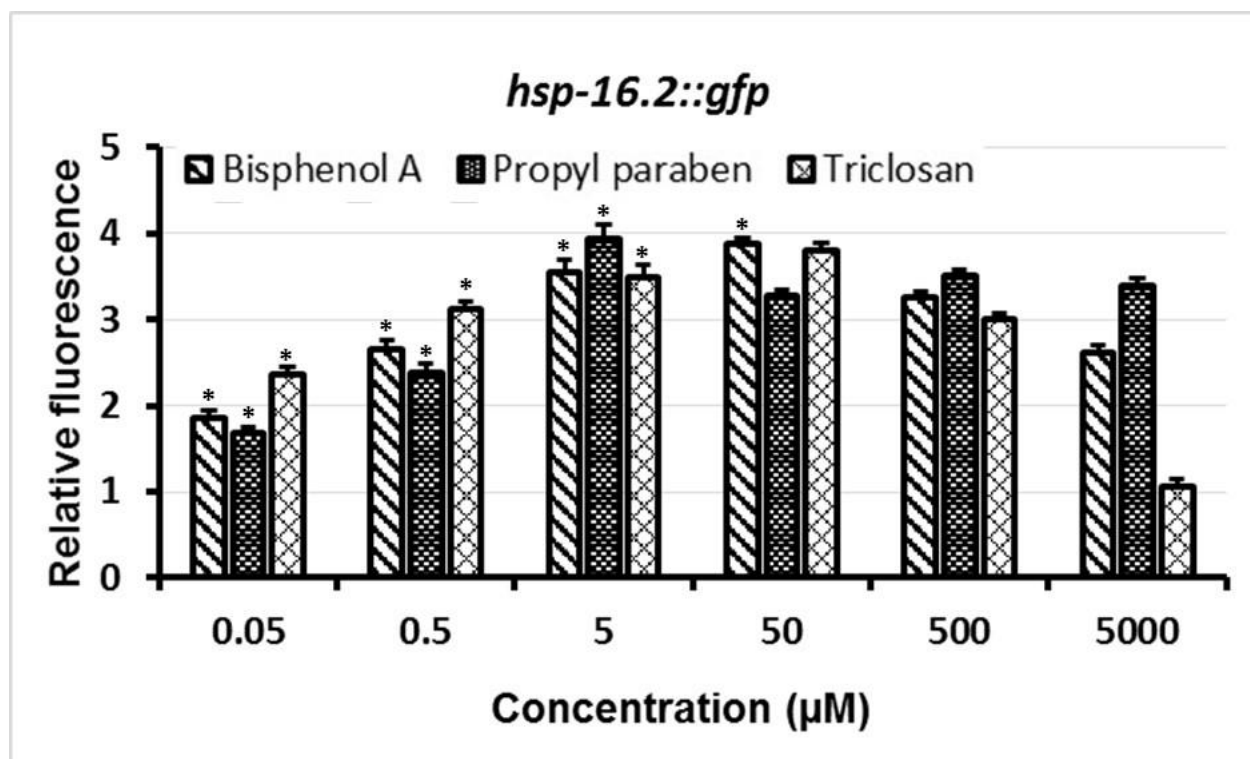

Figure S3. Effects of BPA, PPB and TCS on *hsp-16.2* gene expression measured as GFP fluorescence.

\*. Significant difference with control ( $p < 0.05$ ).

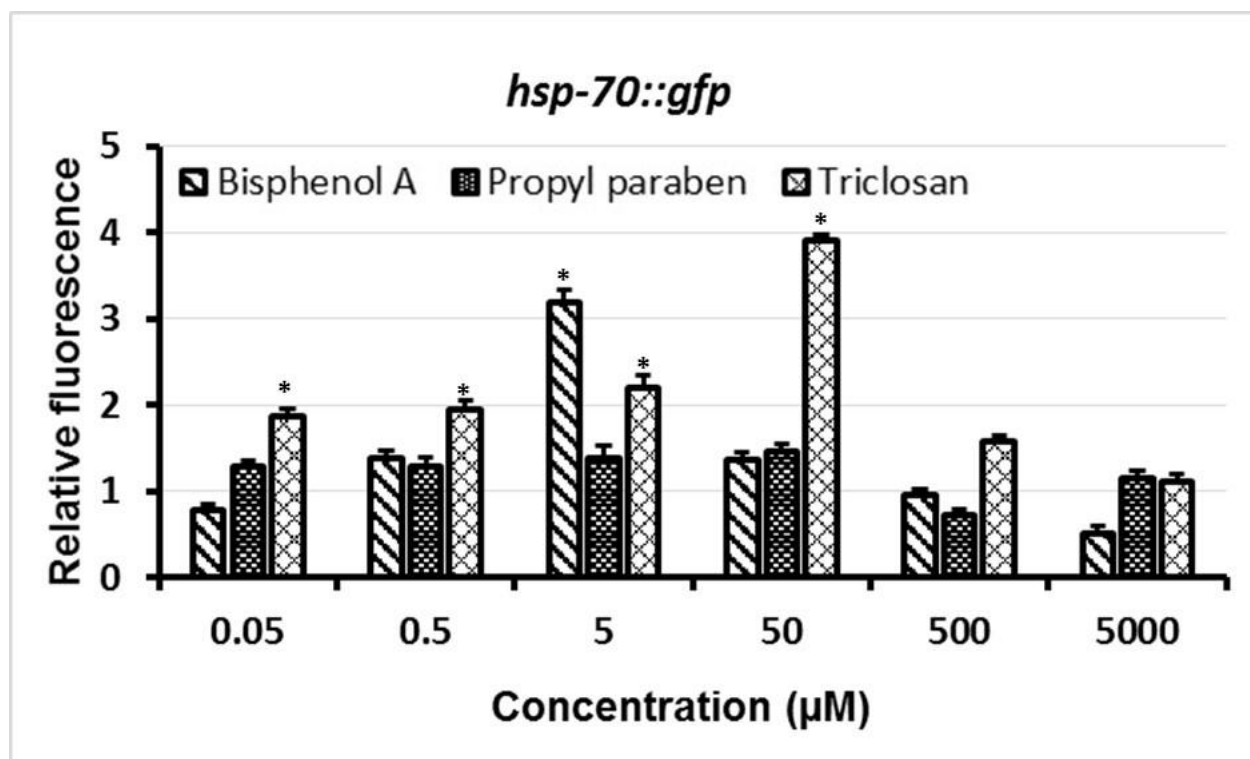

Figure S4. Effects of BPA, PPB and TCS on *hsp-70* gene expression measured as GFP fluorescence.

\*. Significant difference with control ( $p < 0.05$ ).

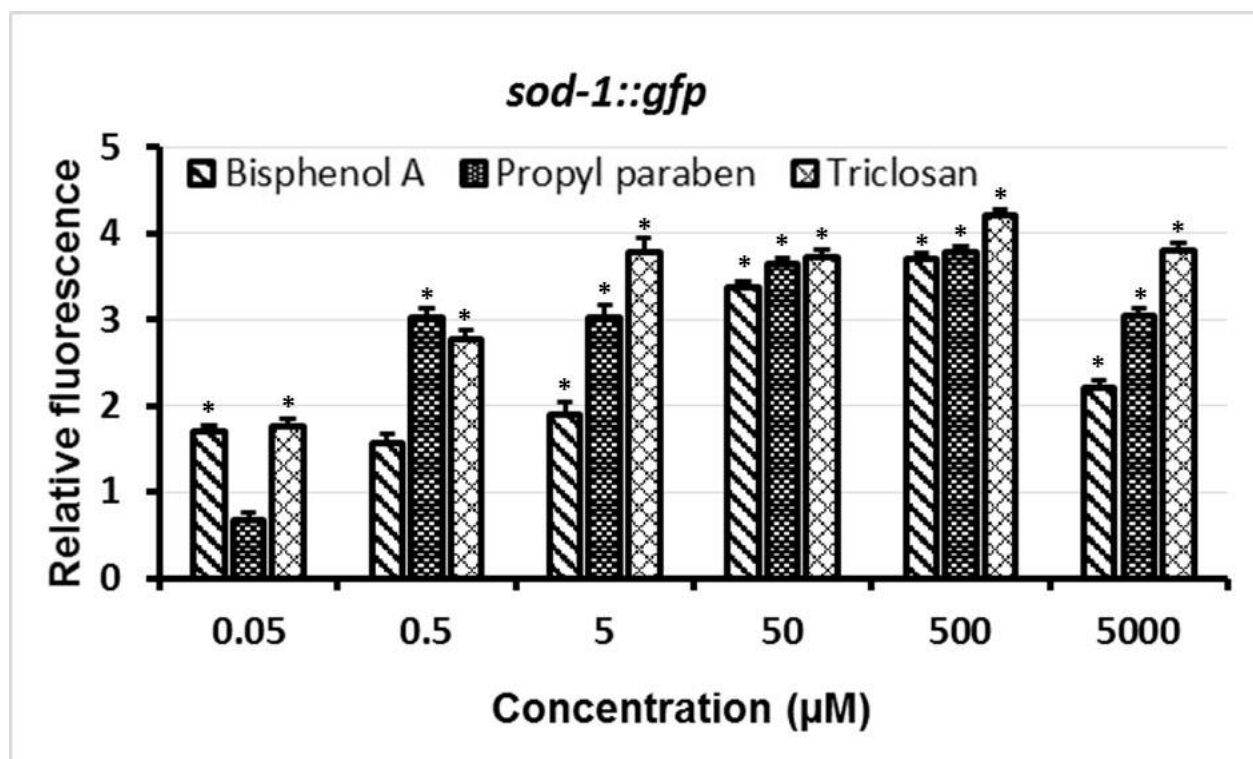

Figure S5. Effects of BPA, PPB and TCS on *sod-1* gene expression measured as GFP fluorescence.

\*. Significant difference with control ( $p < 0.05$ ).

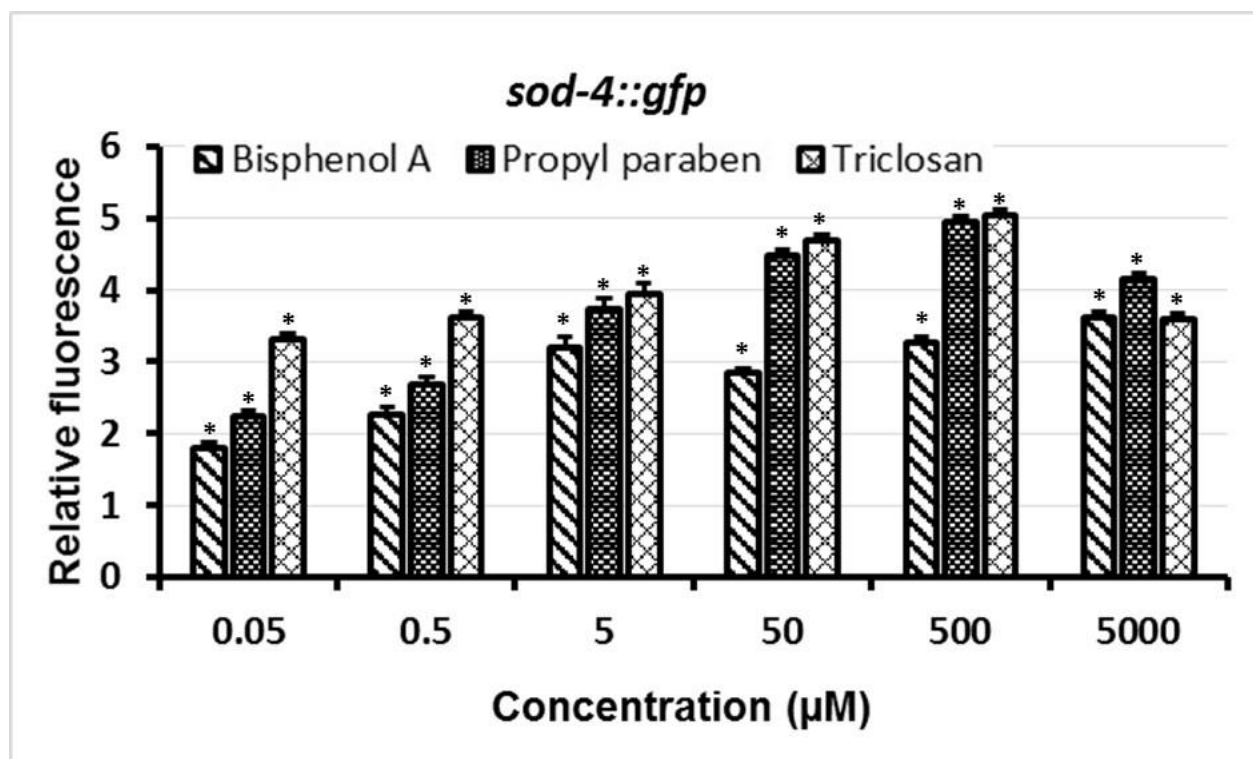

Figure S6. Effects of BPA, PPB and TCS on *sod-4* gene expression measured as GFP fluorescence.

\*. Significant difference with control ( $p < 0.05$ ).

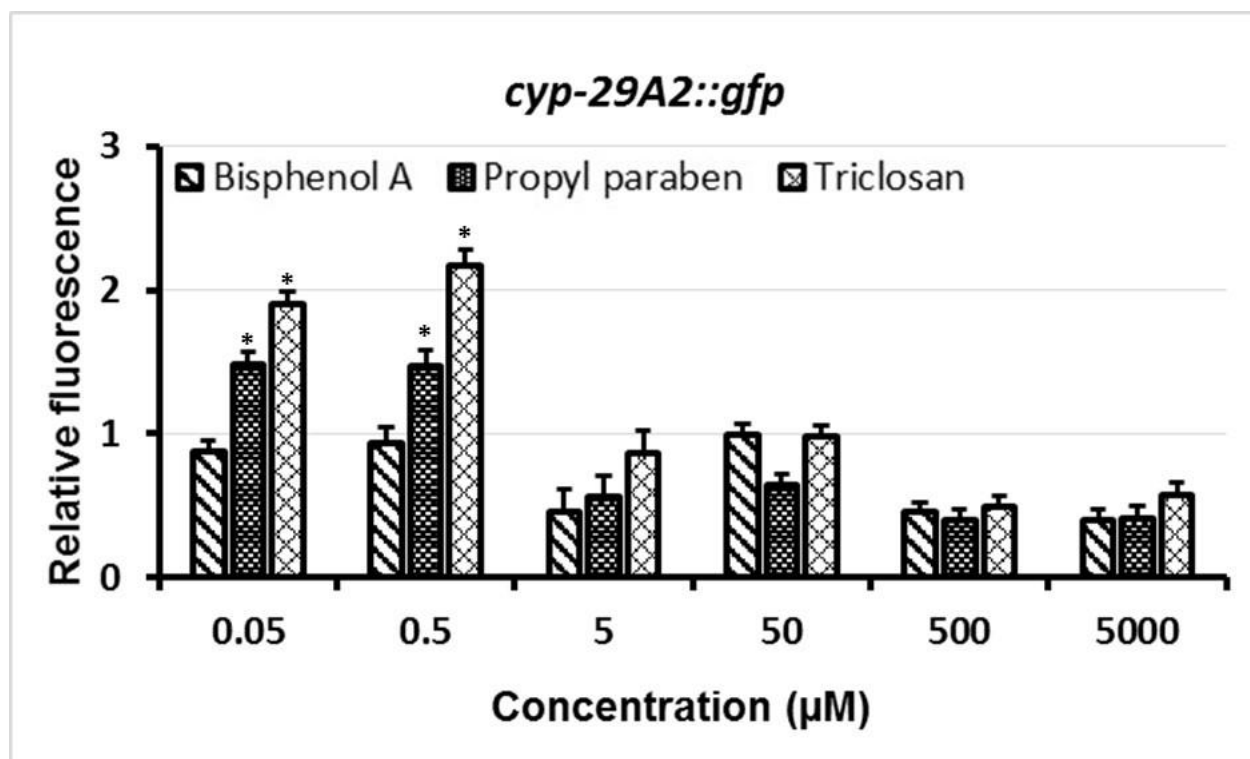

Figure S7. Effects of BPA, PPB and TCS on *cyp-29A2* gene expression measured as GFP fluorescence.

\*. Significant difference with control ( $p < 0.05$ ).

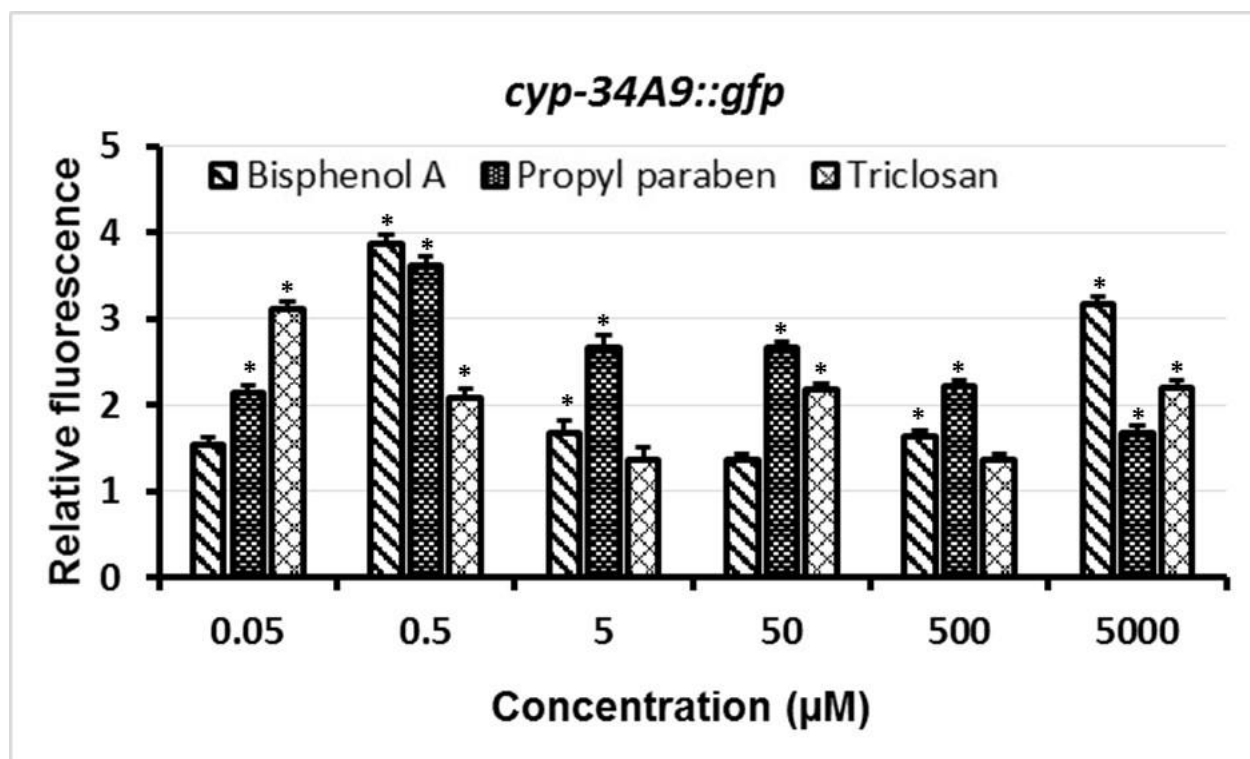

Figure S8. Effects of BPA, PPB and TCS on *cyp-34A9* gene expression measured as GFP fluorescence.

\*. Significant difference with control ( $p < 0.05$ ).



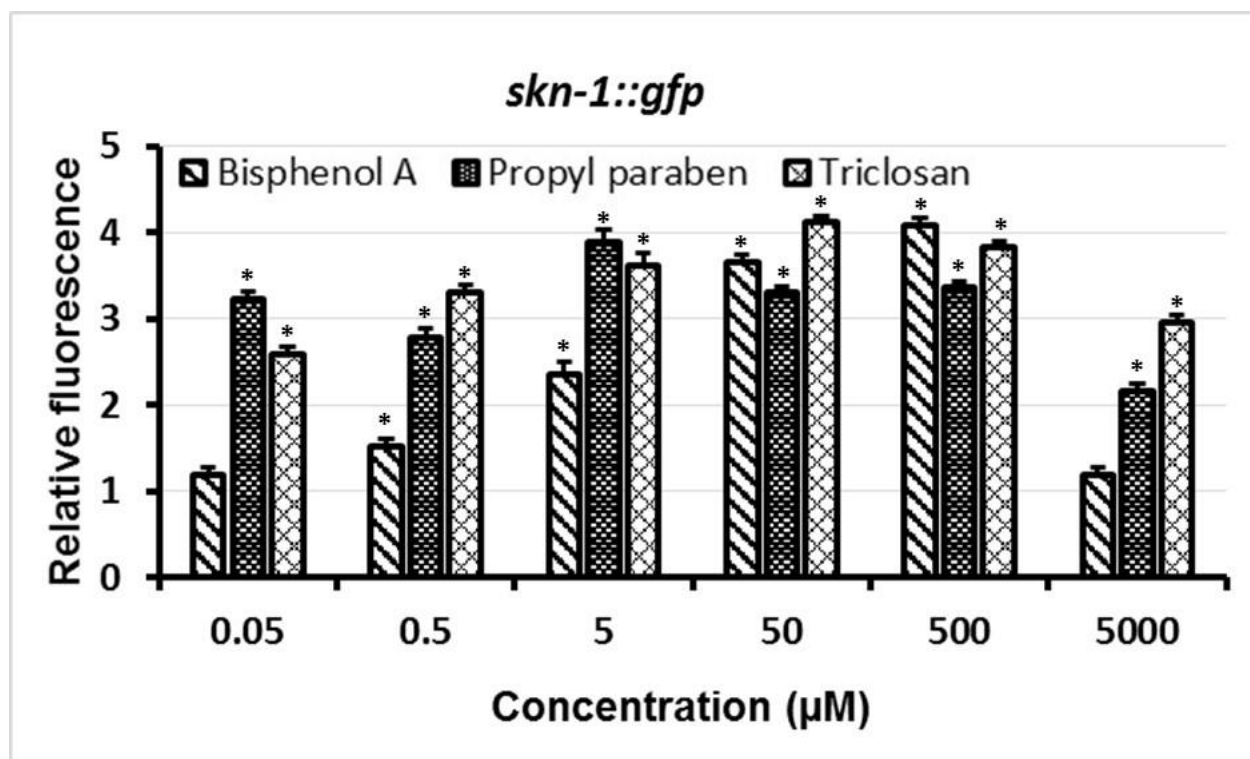

Figure S9. Effects of BPA, PPB and TCS on *skn-1* gene expression measured as GFP fluorescence.

\*. Significant difference with control ( $p < 0.05$ ).
